# Supplementary material
Source: PubMed Central journal article supplement (PMC8105026)
Supplement: AEM.02353-20-s0001.pdf [file AEM.02353-20-s0001.pdf]

## Supplemental materials

### **Acquired Resistance to Severe Ethanol Stress on Protein Quality Control in *Saccharomyces cerevisiae***

Masashi Yoshida, Sae Kato, Shizu Fukuda, Shingo Izawa \*

*Laboratory of Microbial Technology, Graduate School of Science and Technology,  
Kyoto Institute of Technology, Matsugasaki, Kyoto, Japan*

\*Corresponding author: Shingo Izawa

Laboratory of Microbial Technology, Graduate School of Science and Technology,  
Kyoto Institute of Technology, Matsugasaki, Kyoto 606-8585, Japan. Tel./Fax: +81-75-  
724-7764; E-mail: thioredoxin @ kit.ac.jp

**Keywords:** *Saccharomyces cerevisiae*, acquired stress resistance, severe ethanol stress, proteostasis, protein quality control, insoluble proteins, bi-chaperone system, aggregase, Lsg1.

## Legends for Supplemental Figures

### Figure S1.

mRNA levels of various genes analyzed by qRT-PCR. Yeast cells were pre-treated with or without mild stress (6% ethanol stress for 180 min or thermal stress at 37°C for 60 min) and then exposed to 10% (v/v) ethanol stress for 0, 60, 120, or 180 min. Yeast cells were also treated with 6% (v/v) ethanol for 30 min or at 37°C for 30 min. *ACT1* was used as a reference gene for the normalization of qRT-PCR data, and log<sub>2</sub> ratios between the stress treatment groups and control (w/o stress treatment) were calculated ( $n = 3$ ).

### Figure S2.

Confirmation of drug effects of MG132. Cells carrying a FLAG-tagged chromosomal copy of the *BTN2* gene were exposed to mild thermal stress at 37°C for 60 min with or without 100 μM MG132. The levels of Btn2, which is rapidly turned over by the ubiquitin-proteasome system (1), were assessed by Western blotting. The inhibition of proteasomes by MG132 was confirmed by an elevated level of Btn2 in cells treated with MG132 at 37°C. Ponceaus S staining was performed to confirm equal loading and the transfer of all proteins.

### Figure S3.

Insoluble aggregated proteins were collected by the method of Roth *et al.* (2) using mortar-pestle lysis instead of glass bead lysis. Samples were separated using a 10% SDS-polyacrylamide gel and visualized by silver staining. Cells were treated under the same conditions as in Fig. 1B (*left*) and Fig. 3 (*right*).

### Figure S4.

Other images used to generate graphs in Figs. 1B (A), 3A (B), 4 (C), 5 (D), 7A (E), and 8A (F).

## Supplementary references

1. Malinowska L, Kroschwald S, Munder MC, Richter D, Alberti S. 2012. Molecular chaperones and stress-inducible protein-sorting factors coordinate the spatiotemporal distribution of protein aggregates. *Mol Biol Cell* 23:3041–3056.
2. Roth AF, Feng Y, Chen L, Davis NG. 2002. The yeast DHHC cysteine-rich domain protein Akr1p is a palmitoyl transferase. *J Cell Biol* 159:23–28.

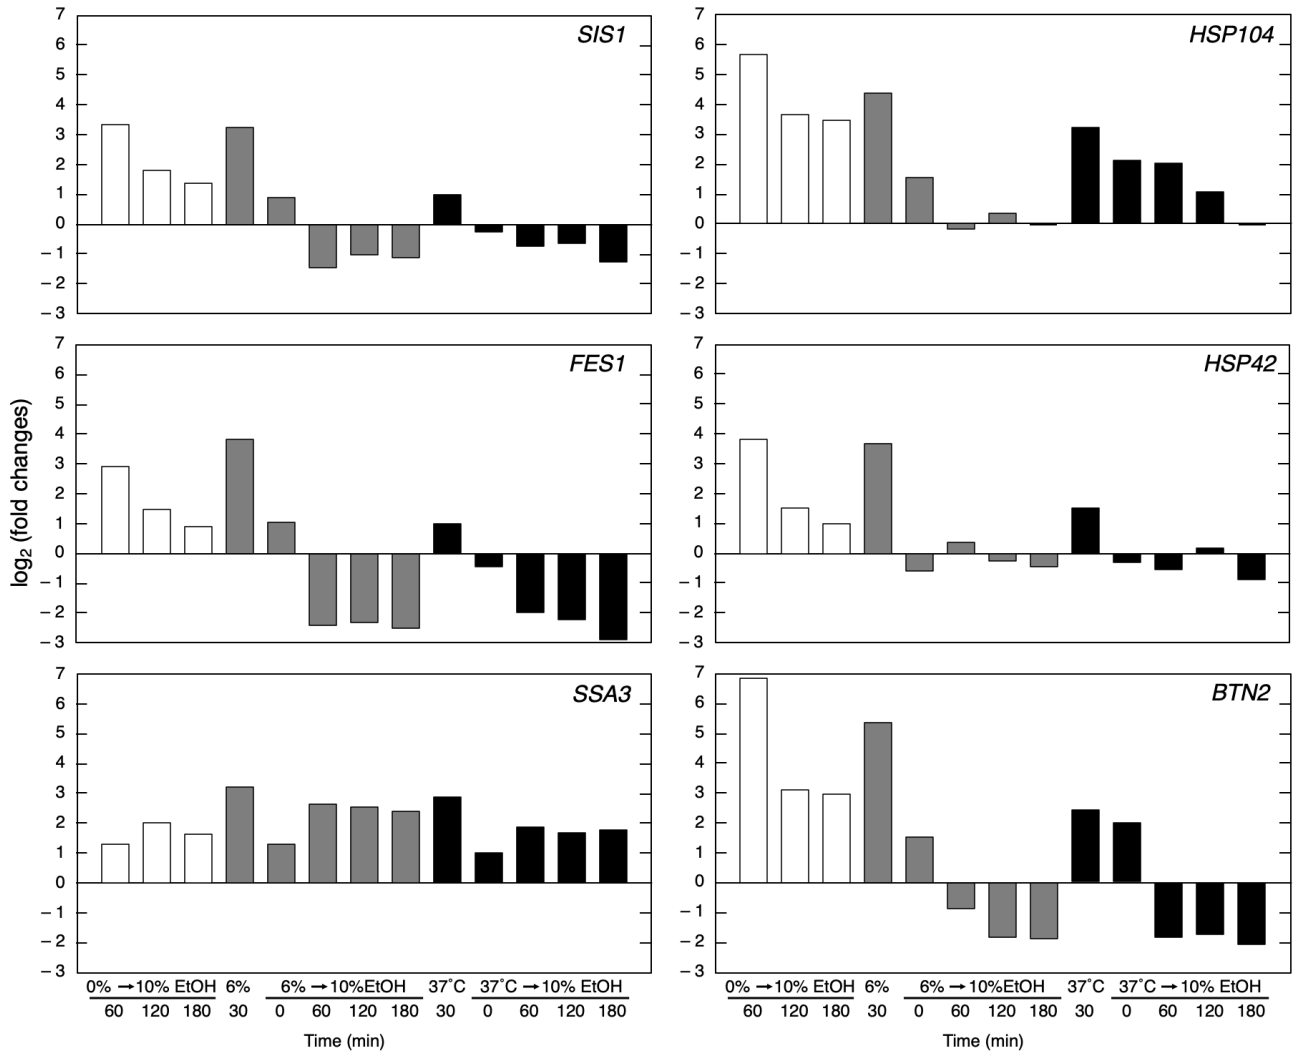

Fig. S1

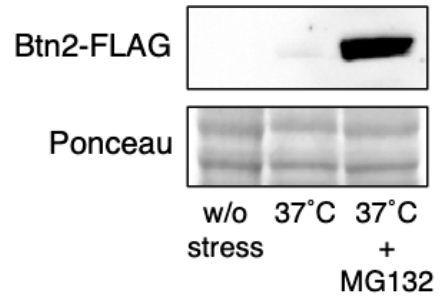

**Fig. S2**

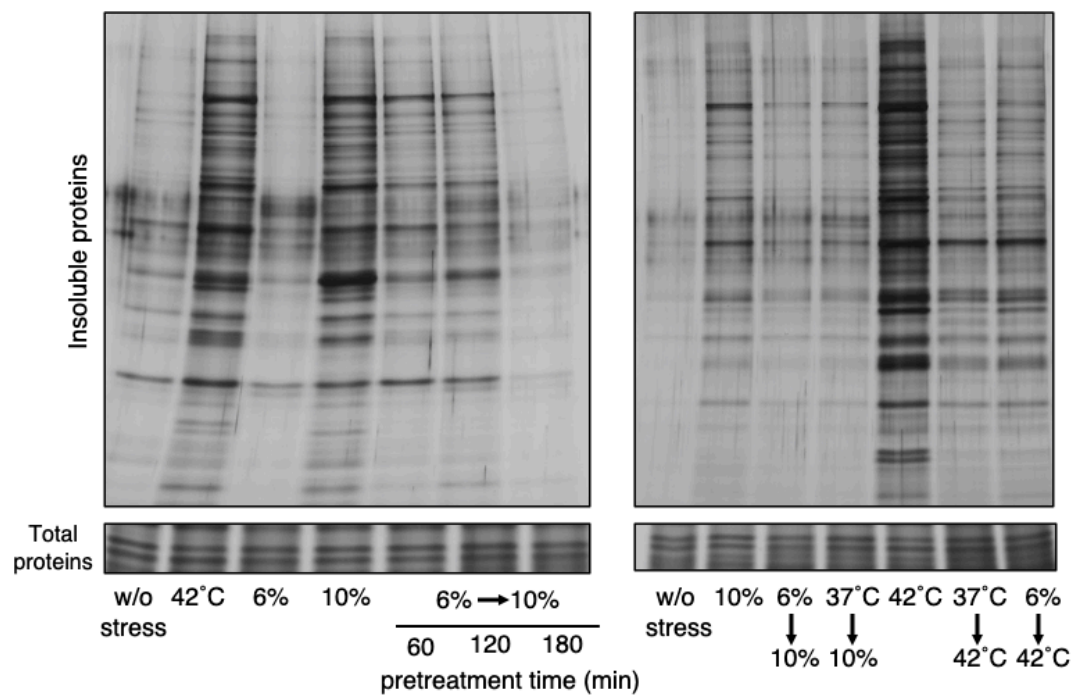

**Fig. S3**

(A)

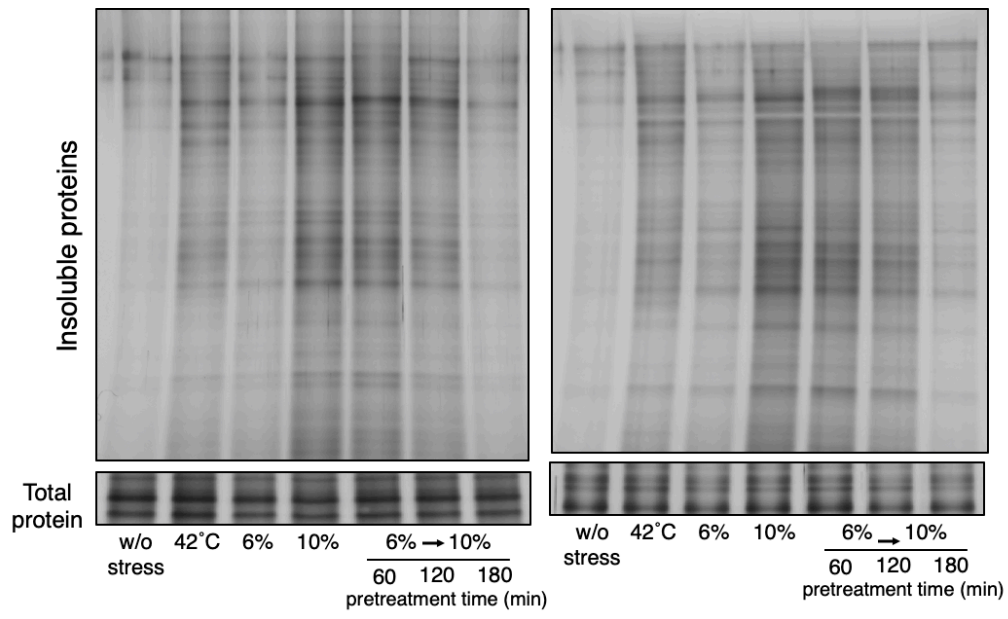

(B)

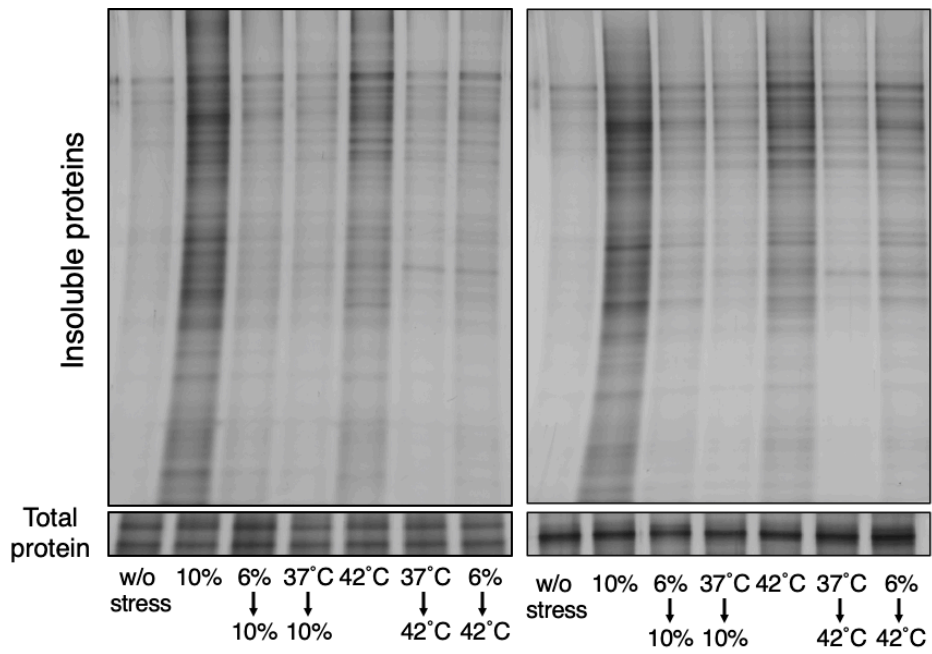

Fig. S4 (A)(B)

(C)

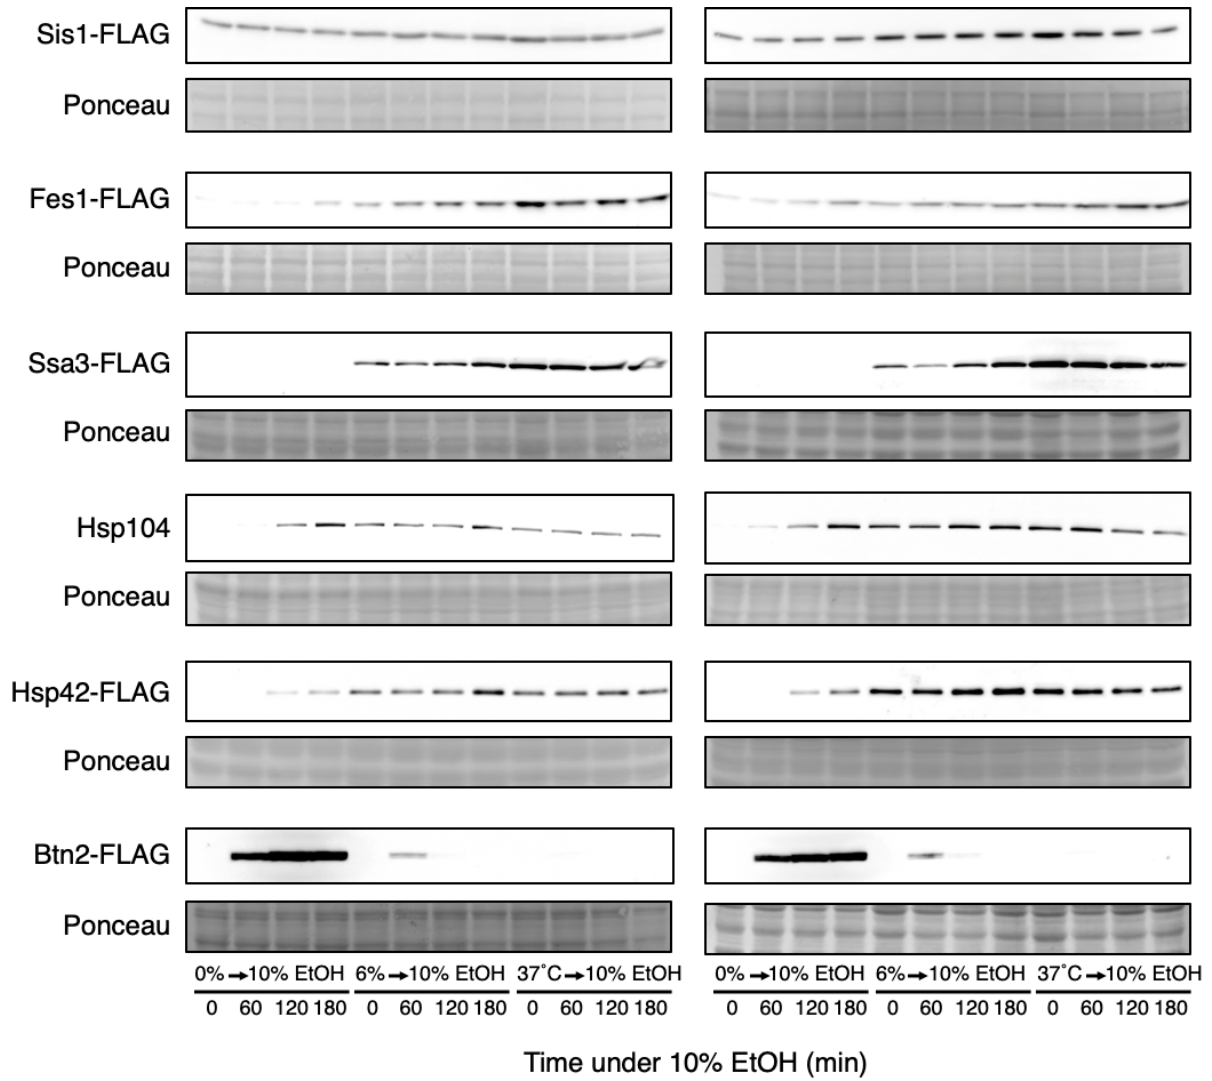

Fig. S4 (C)



(D)

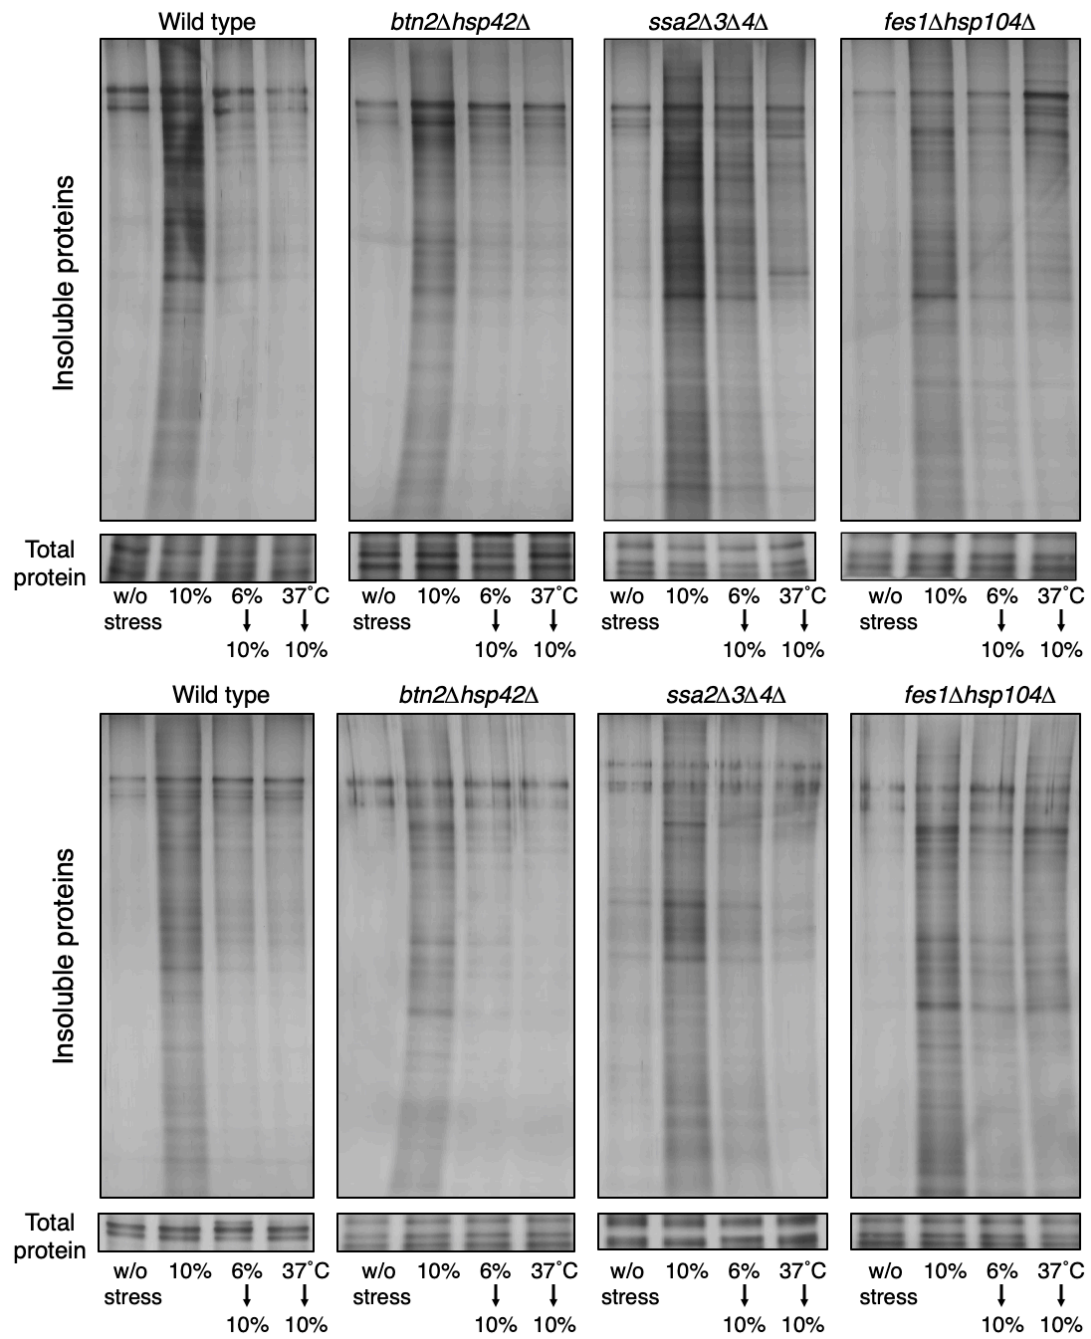

Fig. S4 (D)

(E)

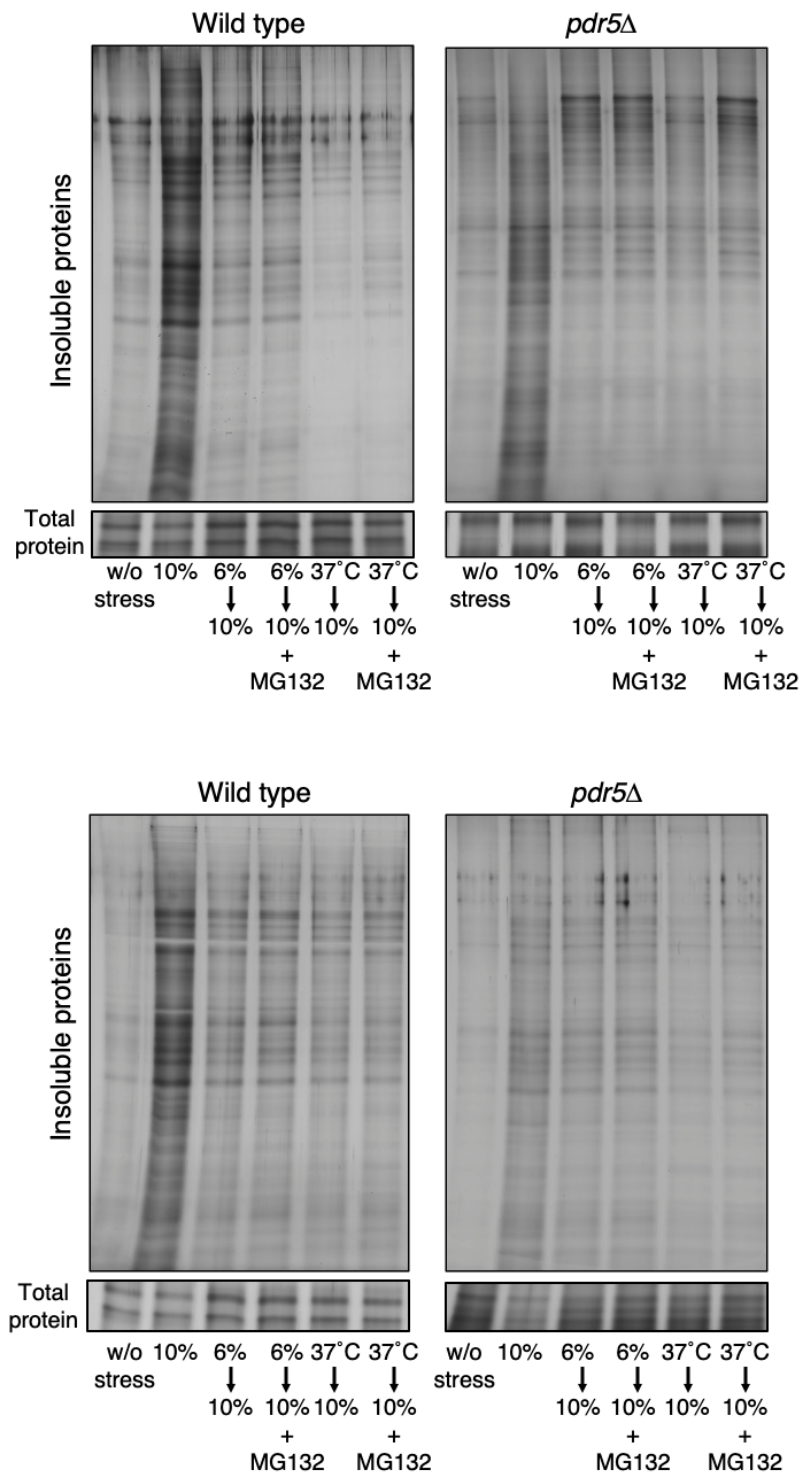

Fig. S4 (E)

(F)

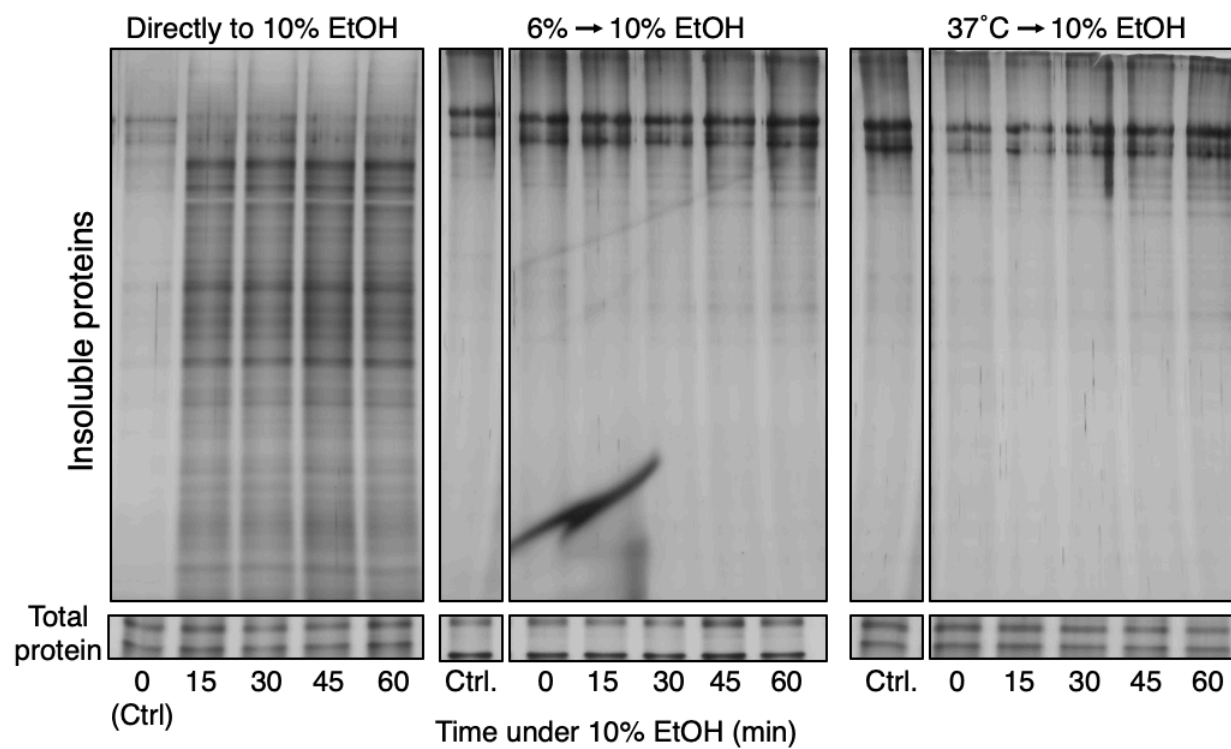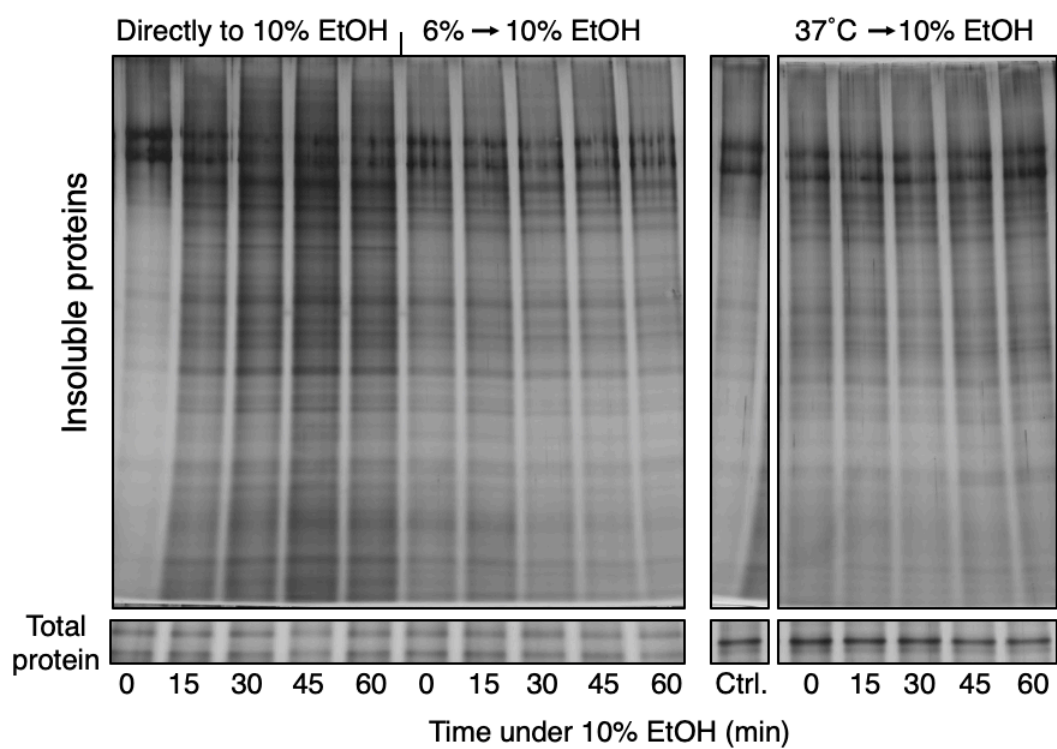

Fig. S4 (F)
